# Supplementary material
Source: Springer Nature journal article supplement (https://www.springermedizin.de/resource/supplementary/12913_2010_1485_MOESM2_ESM.pdf/9528258)

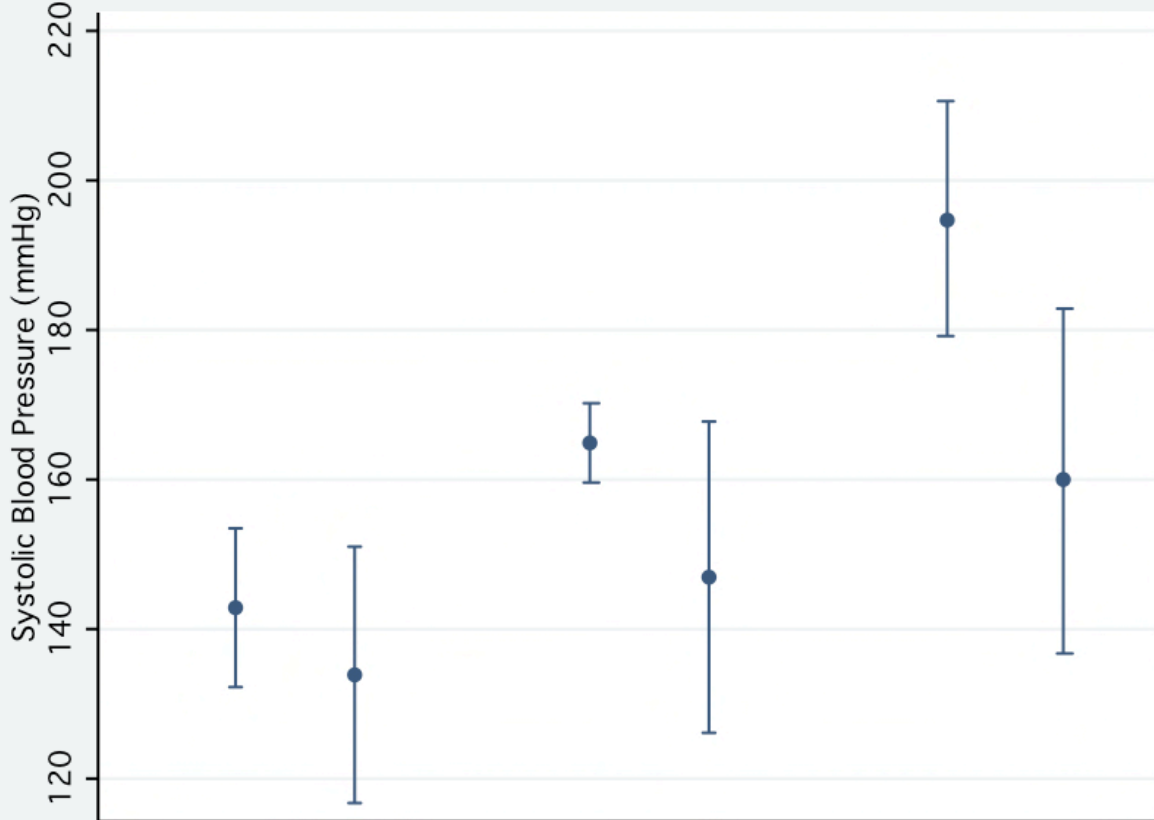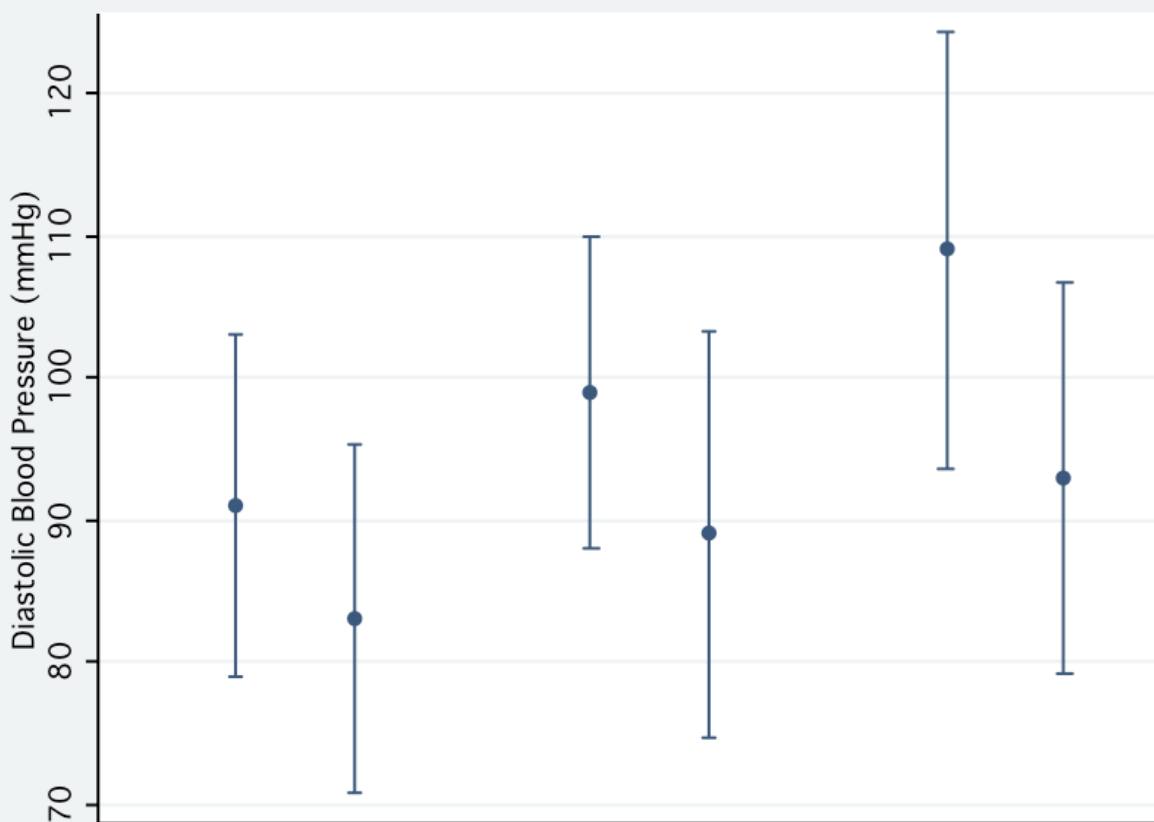

WHO Grade 1

WHO Grade 2

WHO Grade 3

Supplement: MOESM2 [file 9528258]
